# Supplementary material for: Fatty acid oxidation fuels natural killer cell responses against infection and cancer
Source: PubMed Central journal article supplement — Proc Natl Acad Sci U S A. 2024 Mar 5;121(11):e2319254121. doi: 10.1073/pnas.2319254121 (PMC10945797; doi:10.1073/pnas.2319254121), 2024-03-05
Supplement: pnas.2319254121.sapp.pdf [file pnas.2319254121.sapp.pdf]

A

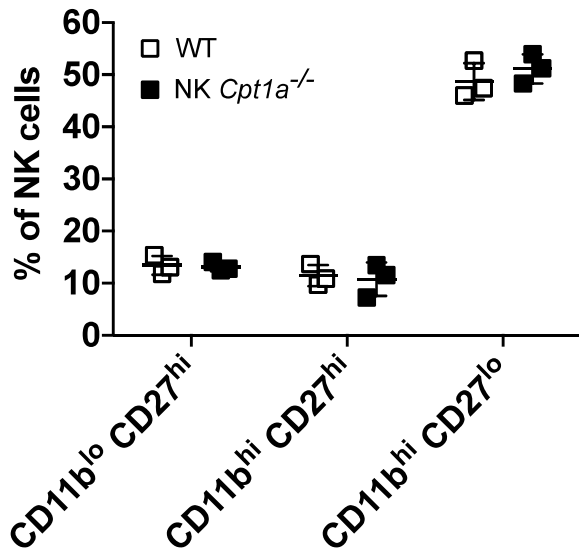

B

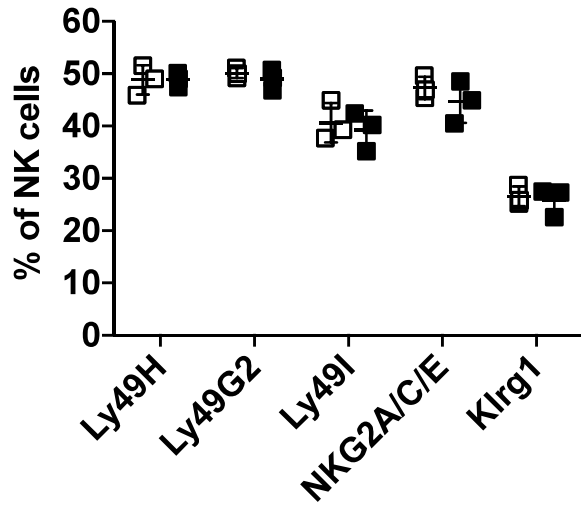

**Supplemental Figure 1. Receptor expression and maturation is CPT1A independent.** (A) Frequency of splenic NK cell subsets, in order of decreasing to increasing maturity (from CD11b<sup>lo</sup> CD27<sup>hi</sup> to CD11b<sup>hi</sup> CD27<sup>hi</sup> to CD11b<sup>hi</sup>CD27<sup>lo</sup>), from WT and NK *Cpt1a*<sup>-/-</sup> mice. (B) Frequency of activating and inhibitory receptors on WT and NK *Cpt1a*<sup>-/-</sup> splenic NK cells. Experiments were performed in mixed bone marrow chimeras. Data are representative of 2-5 independent experiments.

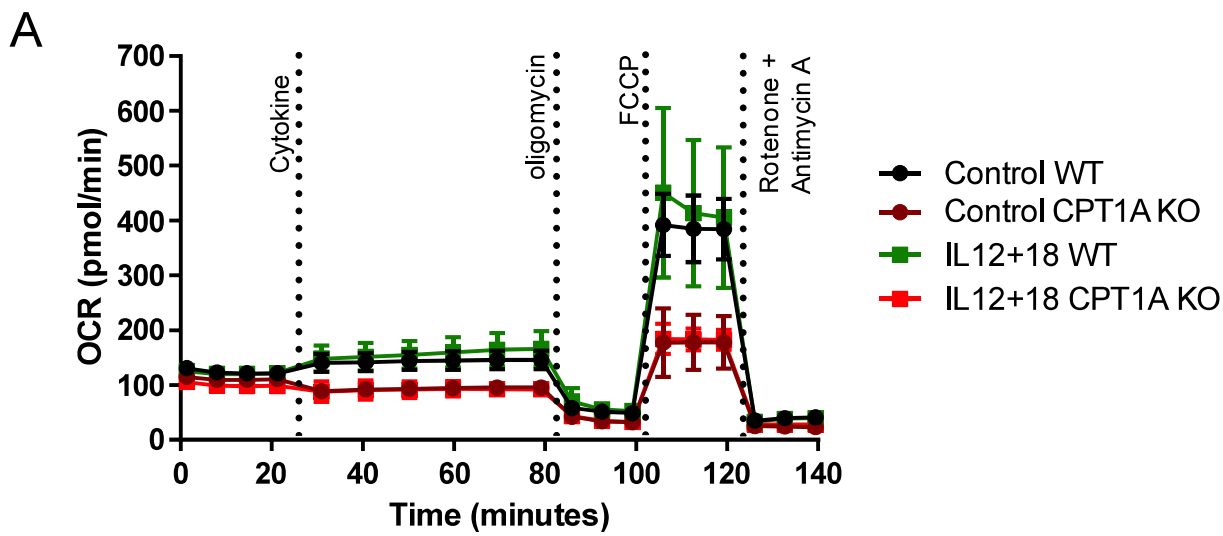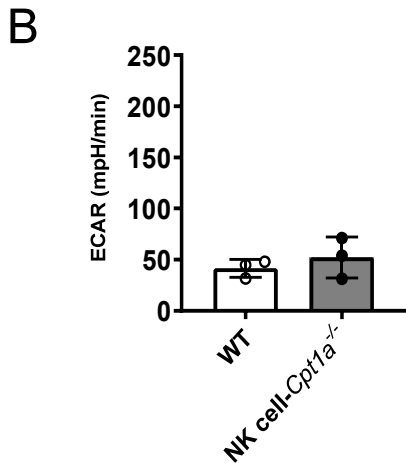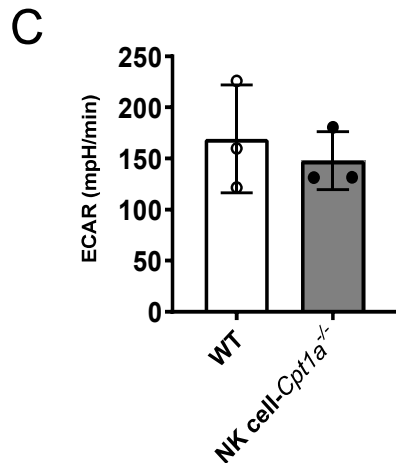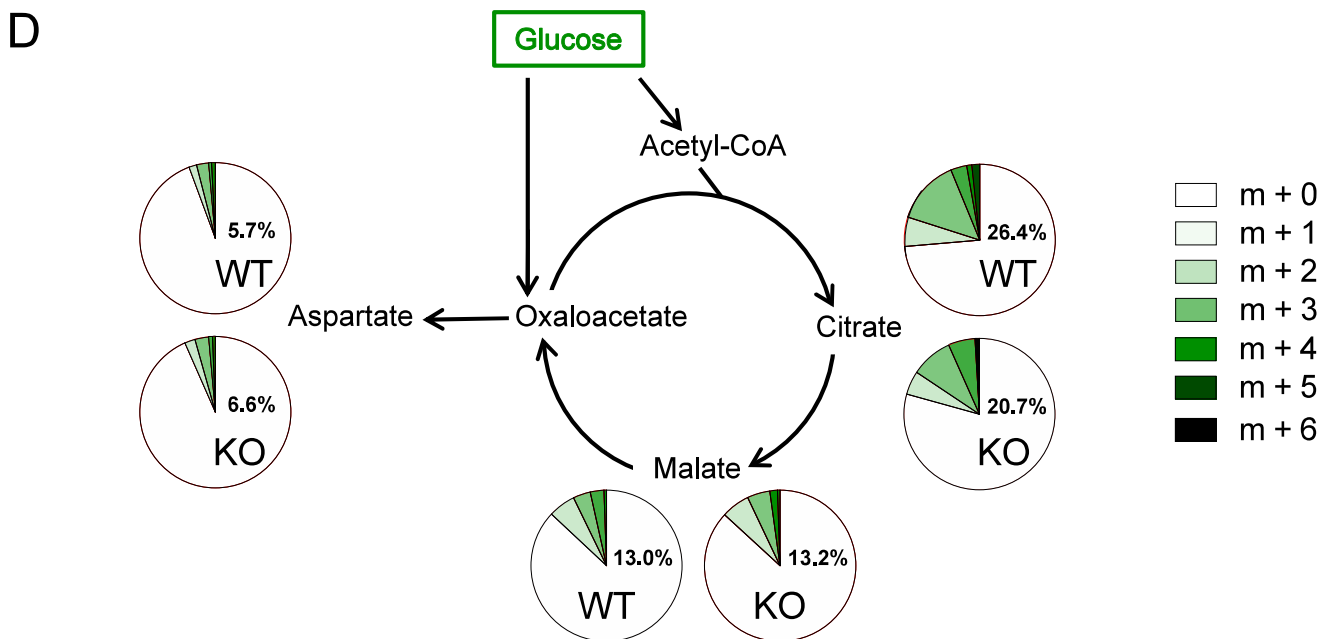

**Supplemental Figure 2. CPT1A deficiency in NK cells impacts oxidative respiration, but not glucose uptake or metabolism.** Representative (A) OCR and (B+C) ECAR of  $4 \times 10^5$  splenic NK cells WT and CPT1A deficient NK cells after a week in culture with IL-15 (50 ng/ml) with (A+C) or without (A+B) stimulation with IL-12 (20 ug/ml) + IL-18 (10 ug/ml). Means are plotted  $\pm$  SD and are representative of two independent experiments. (D)  $^{13}\text{C}$ -labeled glucose was incubated with WT or NK *Cpt1a*<sup>-/-</sup> NK cells for 4h, and incorporation of  $^{13}\text{C}$  into aspartate, citrate, and malate was measured. Relative abundance of isotopologues visualized as pie charts.

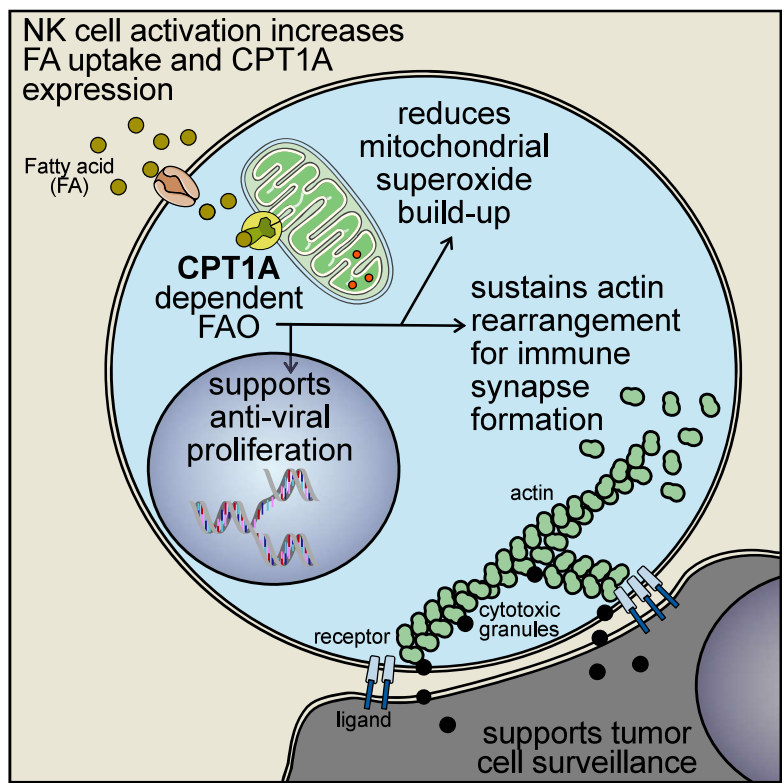

**Supplemental Figure 3. Graphical summary of findings**
